# Supplementary material for: Iron’s Wake: The Performance of Quantum Mechanical-Derived Versus General-Purpose Force Fields Tested on a Luminescent Iron Complex
Source: MDPI journal article supplement (doi:10.3390/molecules25133084), 2020-07-06
Supplement: s1 [file s1]

## Supporting Information:

# Iron's Wake: The Performance of Quantum Mechanical-Derived Versus General-Purpose Force Fields Tested on a Luminescent Iron Complex

Valentin Diez-Cabanes <sup>1,\*</sup>, Giacomo Prampolini <sup>2,\*</sup>, Antonio Francés-Monerris <sup>1,3</sup>, Antonio Monari <sup>1,\*</sup> and Mariachiara Pastore <sup>1,\*</sup>

<sup>1</sup> Université de Lorraine & CNRS, LPCT UMR 7019, F-54000 Nancy, France; antonio.frances@univ-lorraine.fr (A.F-M.)

<sup>2</sup> Istituto di Chimica dei Composti Organo Metallici (ICCOM-CNR), Area della Ricerca, via G. Moruzzi 1, I-56124 Pisa, Italy;

<sup>3</sup> Departament de Química Física, Universitat de València, 46100, Burjassot, Spain

\* Correspondence: valentin.diez@hotmail.com (V.D-C), antonio.monari@univ-lorraine.fr (A. M.), mariachiara.pastore@univ-lorraine.fr (M.P.) ; giacomo.prampolini@pi.iccom.cnr.it (G. P.)

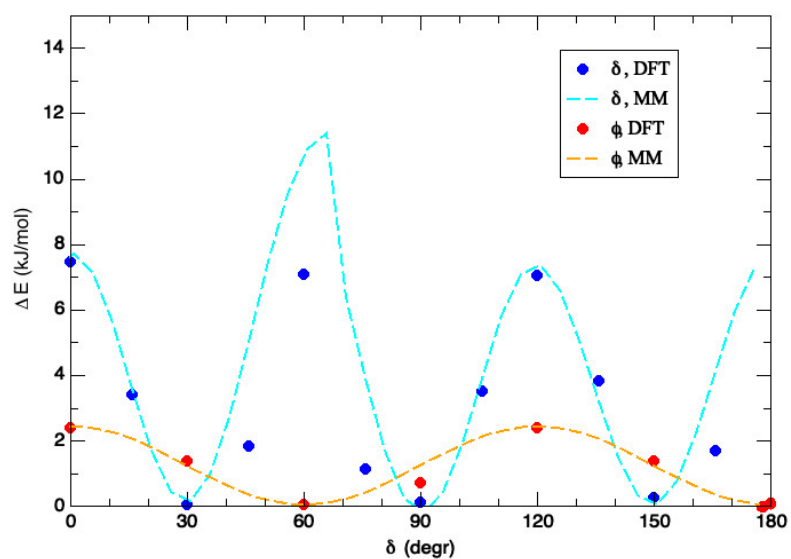

**Figure S1.** Comparison between QM (solid symbols) and MM (dashed lines) relaxed energy scans for the flexible  $\delta$  (blue) and  $\phi$  (red) dihedrals.

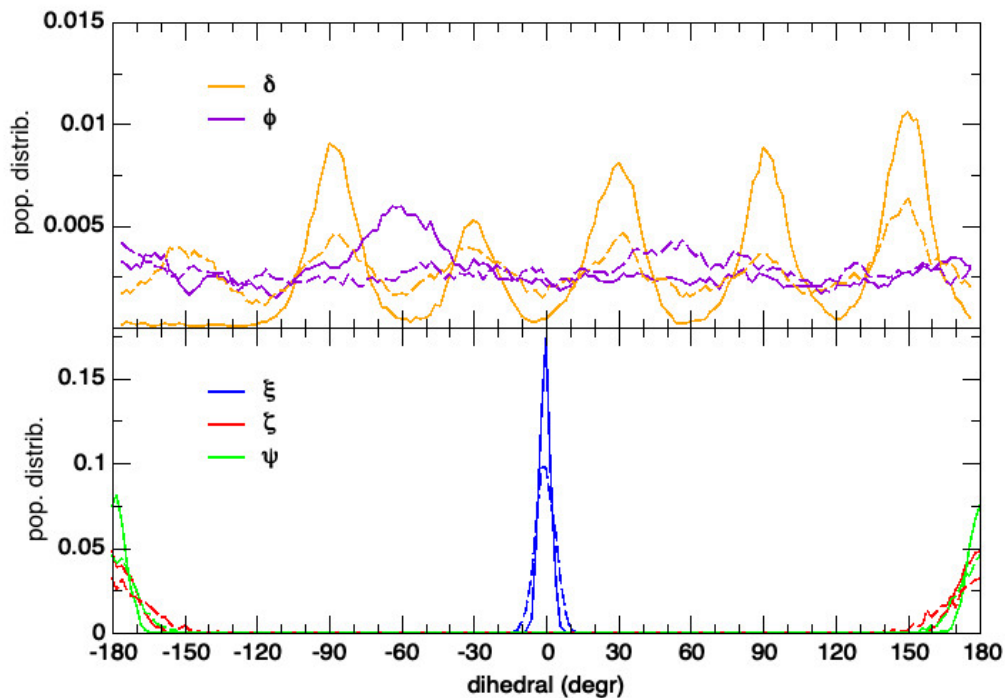

**Figure S2.** Distribution of flexible (top) and stiff (bottom) dihedral, defined in Figure 1, during an NVT-MD run performed on the isolated Fe complex at 298 K (solid lines) or at 1000 K (dashed lines).

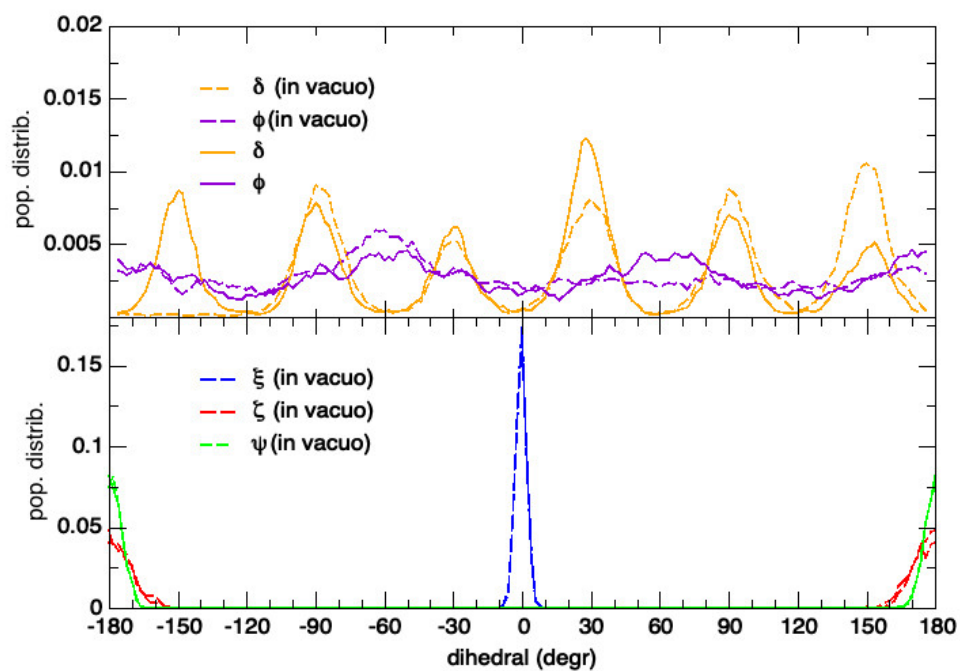

**Figure S3.** Distribution of flexible (top) and stiff (bottom) dihedral, defined in Figure 1, during the 10 ns NPT-MD production run performed on the solvated Fe complex at 298 K and 1 atm (solid lines) or in vacuum at the same temperature (dashed lines); by employing the QMD-FF parameters.

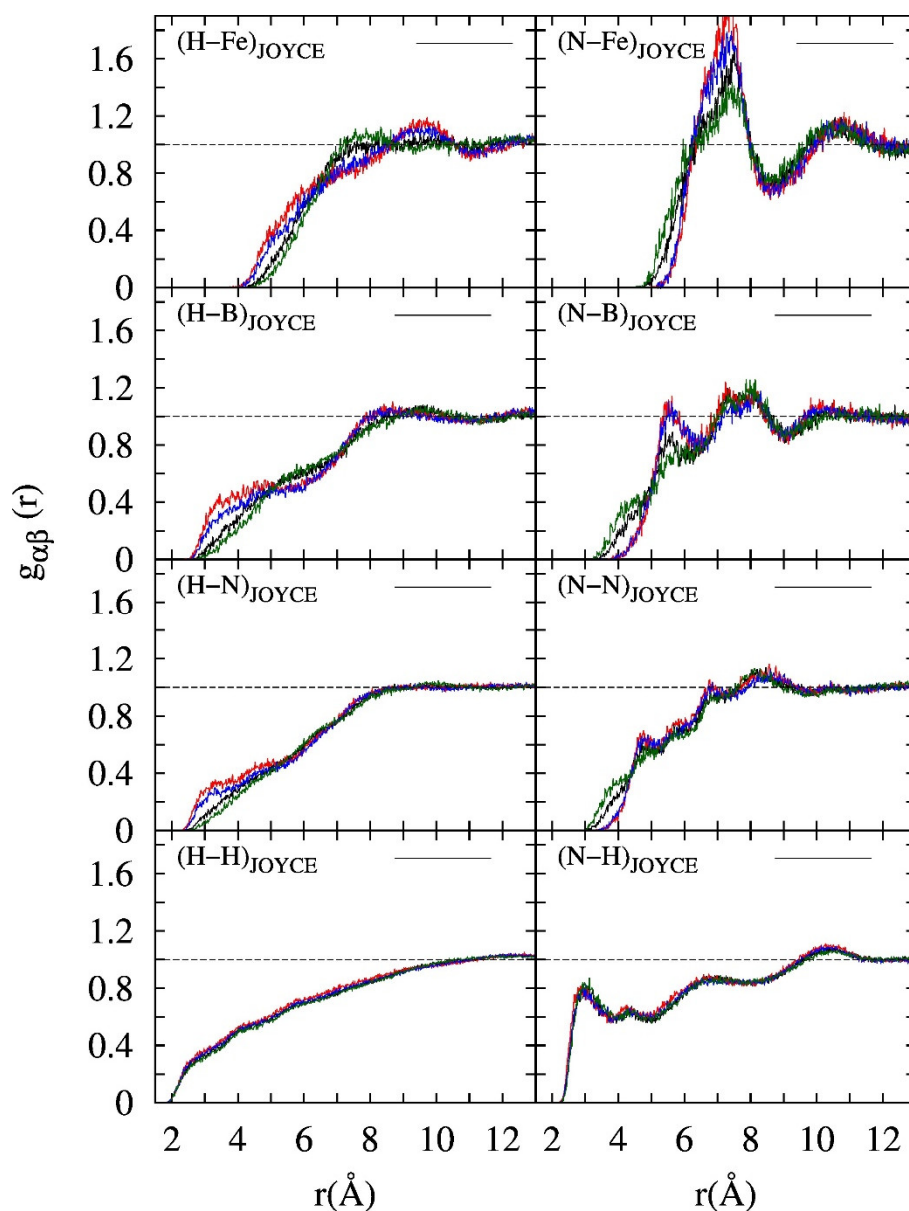

**Figure S4.** Atomic pair correlation functions  $g_{\alpha\beta}$ , computed with RESP (black), NPA (red), CM5 (blue) and ChelpG (green) atomic charges along the JOYCE MD simulation runs, between the solute ( $\beta$ ) atoms (Fe, B, N and H from  $-\text{CH}_3$  group) of the complex as indicated in the ( $\alpha$ - $\beta$ ) legend, and either the N (left part) or H (right part graphs) atoms of the acetonitrile solvent ( $\alpha$ ).

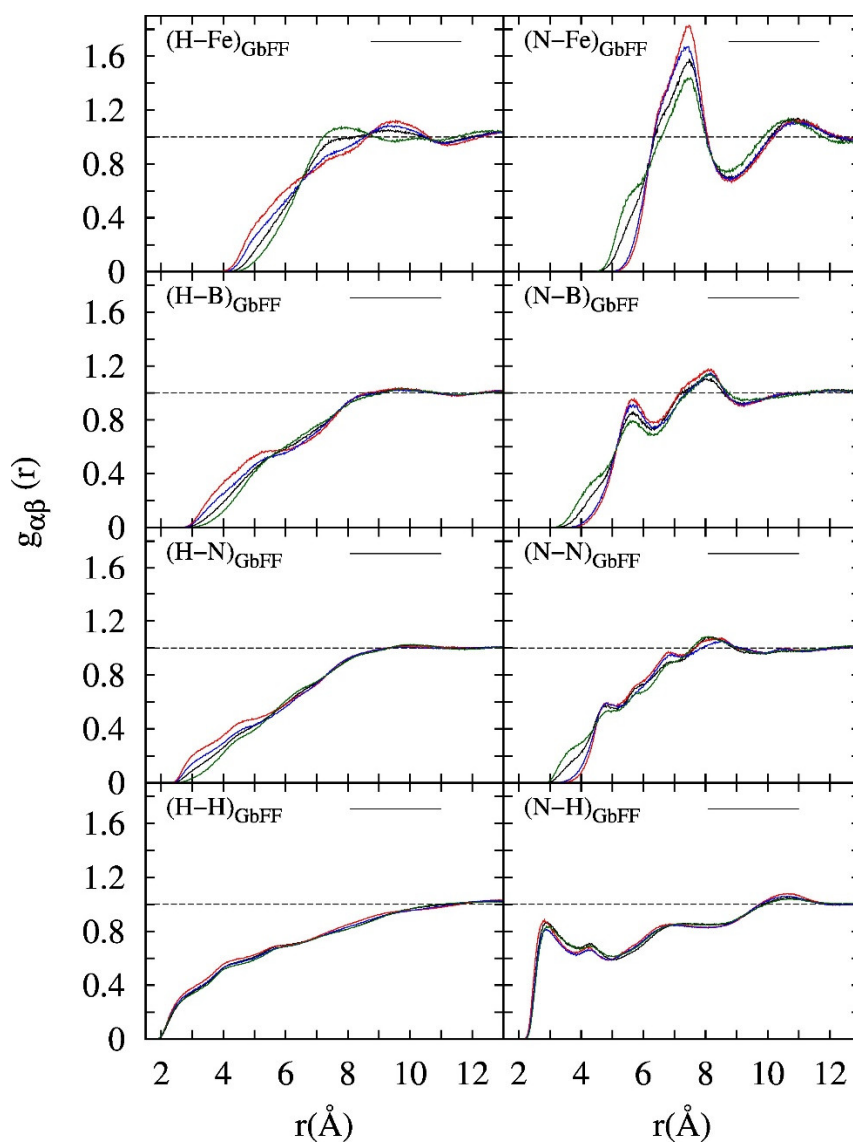

**Figure S5.** Atomic pair correlation functions  $g_{\alpha\beta}$ , computed with RESP (black), NPA (red), CM5 (blue) and ChelpG (green) atomic charges along the GbFF MD simulation runs, between the solute ( $\beta$ ) atoms (Fe, B, N and H from  $-\text{CH}_3$  group) of the complex as indicated in the ( $\alpha$ - $\beta$ ) legend, and either the N (left part) or H (right part graphs) atoms of the acetonitrile solvent ( $\alpha$ ).

**Table S1.** Statistic data taken from the normal distribution of the ( $^2\text{LMCT}$ ) band centers ( $\lambda_{\text{max}}$ ). This distribution has been analyzed by considering all the TD-DFT individual spectra for each MD run snapshot studied in this work: average ( $\mu$ ) and standard deviations ( $\sigma$ ) values in nm.

|          | JOYCE |          | GbFF  |          |
|----------|-------|----------|-------|----------|
| MM layer | $\mu$ | $\sigma$ | $\mu$ | $\sigma$ |
| ACN      | 456.3 | 18.6     | 539.1 | 32.1     |
| ACN+ion  | 456.5 | 16.9     | 527.6 | 37.7     |

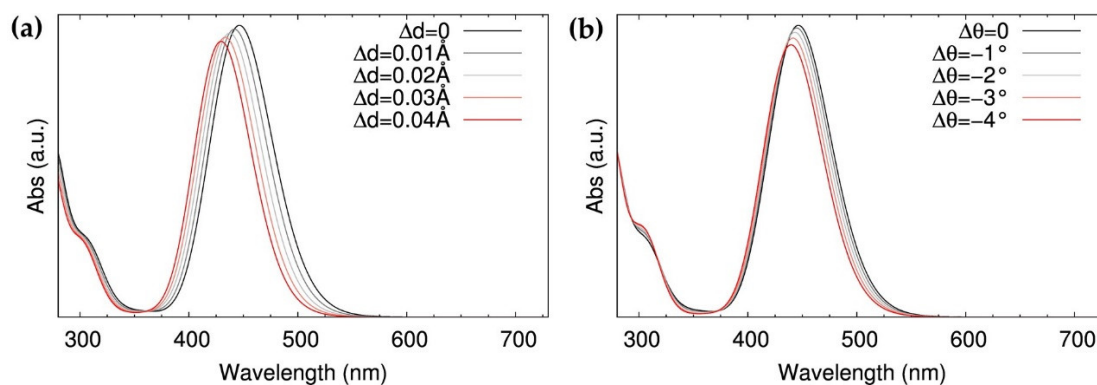

**Figure S6.** TD-DFT simulated spectra for the DFT GS complex geometries obtained upon the scan performed along the coordinates dictating the octahedral coordination: **(a)** the elongation of the Fe-C bonds (distance  $d$ ); and **(b)** the bending of the C-Fe-C angles ( $\theta$  angle) formed by the equivalent ligands. The geometry scan has been taken for each increment of  $0.01 \text{ \AA}$  in the Fe-C bond distances; and a decrease of  $1^\circ$  in the case of the C-Fe-C angles. Note that the change from GbFF based (red) to DFT and XRD (black color) equilibrium Fe-C distances and C-Fe-C angles, is translated in a red-shift in the spectra which already increases the absorption energies underestimation observed in the GbFF minimized structure spectrum (see Figure 7).

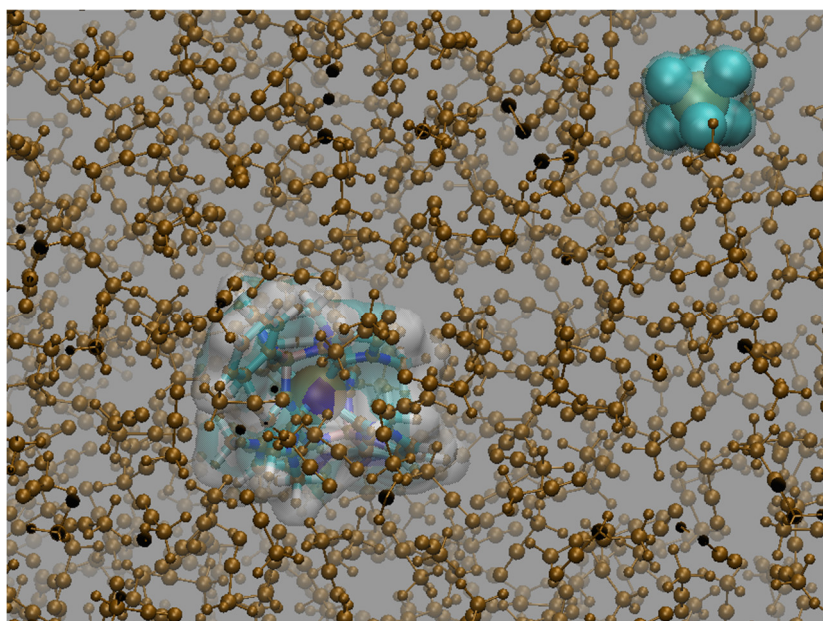

**Figure S7.** Snapshot of a large portion of the final equilibrated configuration of the solvated Fe complex (in the bottom, licorice representation) and its  $\text{PF}_6^-$  counter-ion (in top right corner with vdW spheres) in acetonitrile (balls&sticks) at 1 atm and 298 K.



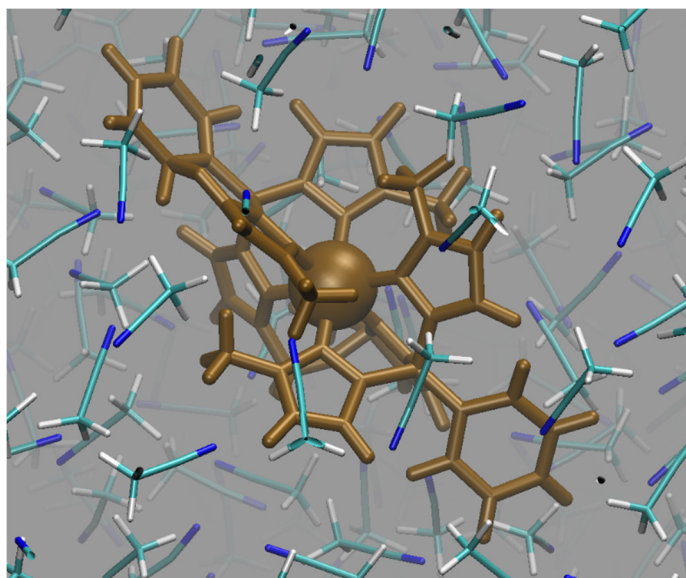

**Figure S8.** Zoom on the neighboring solvent molecules (licorice, Carbon, Nitrogen and Hydrogen are in cyan, white, and blue, respectively) around the Fe complex in its final equilibrated configuration.

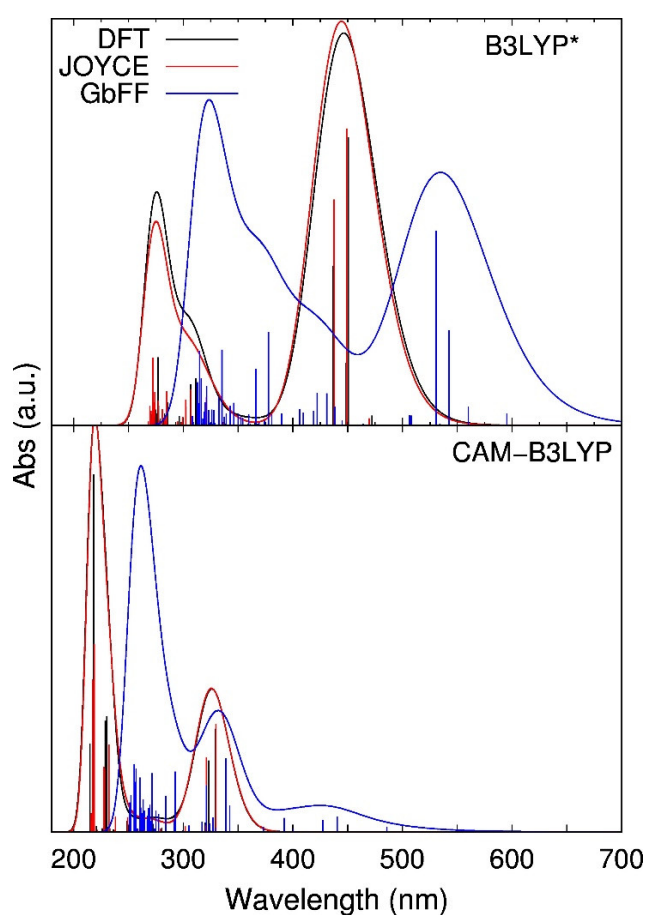

**Figure S9.** TD-DFT simulated spectra for the zero temperature complex structures obtained upon DFT (black), MM based JOYCE (red) and GbFF (blue) energy relaxations, as calculated by employing B3LYP\* with 15% of Hartree-Fock exchange-correlation fraction (top panel) and CAM-B3LYP (bottom panel) functionals.
